# Supplementary material for: An efficient and robust lanthanum strontium cobalt ferrite catalyst as a bifunctional oxygen electrode for reversible solid oxide cells
Source: Royal Society of Chemistry journal article supplement (doi:10.1039/d0ta11233j), 2021-01-01
Supplement: d0ta11233j1.pdf [file d0ta11233j1.pdf]

## Supporting Information

### **An Efficient and Robust Lanthanum Strontium Cobalt Ferrite Catalysts as a Bifunctional Oxygen Electrode for Reversible Solid Oxide Cells**

Doyeub Kim<sup>a, †</sup>, Jin Wan Park<sup>c, †</sup>, Munseok S. Chae<sup>c, †</sup>, Incheol Jeong<sup>c</sup>, Jeong Hwa Park<sup>c</sup>, Kyeong Joon Kim<sup>a</sup>, Jong Jun Lee<sup>c</sup>, Chanhon Jung<sup>c</sup>, Chan-Woo Lee<sup>b, \*</sup>, Seung-Tae Hong<sup>c, \*</sup>, and Kang Taek Lee<sup>a, \*</sup>

<sup>a</sup>*Department of Mechanical Engineering, Korea Advanced Institute of Science and Technology (KAIST), Daejeon, 34141, Republic of Korea*

<sup>b</sup>*Platform Technology Laboratory, Korea Institute of Energy Research (KIER), Daejeon, 34129, Republic of Korea*

<sup>c</sup>*Department of Energy Science and Engineering, Daegu Gyeongbuk Institute of Science and Technology (DGIST), Daegu 42988, Republic of Korea*

† These authors contributed equally to this work

\*Corresponding Authors: leekt@kaist.ac.kr, st.hong@dgist.ac.kr, and cwandtj@kier.re.kr

**Contents:**

**Table S1-S5, Fig. S1-S15**

**Table S1.** Comparison of selected interatomic distances (Å) in the structure of LSCF2882 and LSCF6428 at room temperature.

| Type of atomic bonding | Interatomic distances (Å) |                |
|------------------------|---------------------------|----------------|
|                        | LSCF2882                  | LSCF6428       |
| La1/Sr1-O1             | 2.724(1) Å × 12           | 2.490(6) Å × 3 |
|                        |                           | 2.754(1) Å × 6 |
| Co1/Fe1-O1             | 1.926(1) Å × 6            | 3.017(6) Å × 3 |
|                        |                           | 1.960(1) Å × 6 |
| O1-O1                  | 2.724(1) Å                | 2.755(2) Å     |
|                        |                           | 2.791(1) Å     |

**Table S2.** Comparison of selected interatomic angles ( $^{\circ}$ ) in the structure of LSCF2882 and LSCF6428 at room temperature.

| Type of atomic bonding | Interatomic angle ( $^{\circ}$ ) |                     |
|------------------------|----------------------------------|---------------------|
|                        | LSCF2882                         | LSCF6428            |
| O1- Co1/Fe1-O1         | 90.000(1) $^{\circ}$             | 89.24(2) $^{\circ}$ |
|                        |                                  | 90.75(2) $^{\circ}$ |
| O1-La1/Sr1-O1          | 60.000(1) $^{\circ}$             | 84.52(1) $^{\circ}$ |
|                        | 90.000(1) $^{\circ}$             | 60.87(3) $^{\circ}$ |
|                        |                                  | 63.12(8) $^{\circ}$ |

**Table S3.**  $k_{\text{chem}}$  and  $D_{\text{chem}}$  values for LSCF2882 and LSCF6428 as functions of temperature from 650 to 800 °C.

| Temperature (°C) | LSCF2882                                |                                                      | LSCF6428                                |                                                      |
|------------------|-----------------------------------------|------------------------------------------------------|-----------------------------------------|------------------------------------------------------|
|                  | $k_{\text{chem}}$ (cm s <sup>-1</sup> ) | $D_{\text{chem}}$ (cm <sup>2</sup> s <sup>-1</sup> ) | $k_{\text{chem}}$ (cm s <sup>-1</sup> ) | $D_{\text{chem}}$ (cm <sup>2</sup> s <sup>-1</sup> ) |
| 800              | $3.24 \times 10^{-3}$                   | $1.03 \times 10^{-4}$                                | $1.39 \times 10^{-3}$                   | $6.69 \times 10^{-6}$                                |
| 750              | $1.81 \times 10^{-3}$                   | $6.81 \times 10^{-5}$                                | $6.74 \times 10^{-4}$                   | $4.28 \times 10^{-6}$                                |
| 700              | $1.12 \times 10^{-3}$                   | $5.13 \times 10^{-5}$                                | $4.57 \times 10^{-4}$                   | $2.52 \times 10^{-6}$                                |
| 650              | $7.66 \times 10^{-4}$                   | $1.76 \times 10^{-5}$                                | $1.62 \times 10^{-4}$                   | $1.72 \times 10^{-6}$                                |

**Table S4.** Calculated volume expansion of the cell for LSCF2882 and LSCF6428 by introducing oxygen vacancies.

|                                   | LSCF2882 | LSCF6428 |
|-----------------------------------|----------|----------|
| Pristine model ( $\text{\AA}^3$ ) | 459      | 448      |
| Vacancy model ( $\text{\AA}^3$ )  | 466      | 459      |
| Expansion (%)                     | 1.53     | 2.41     |

**Table S5.** Elementary ORR processes and corresponding reaction orders.

| Elementary Reactions            |                                                          | Reaction order (n) | Ref   |
|---------------------------------|----------------------------------------------------------|--------------------|-------|
| Adsorption of oxygen            | $O_{2(g)} \leftrightarrow O_{2,ad}$                      | 1                  | 1,2,4 |
| Dissociation of adsorbed oxygen | $O_{2,ad} \rightarrow 2O_{ad}$                           | 1/2                | 3,4   |
| Charge Transfer                 | $O_{ad} + e' \rightarrow O_{ad}'$                        | 1/4                | 1,4   |
|                                 | $O_{TPB}' + e' \rightarrow O_{TPB}''$                    |                    |       |
| Oxygen ion incorporation        | $O_{TPB}'' + V_O^{\bullet\bullet} \leftrightarrow O_O^X$ | 1/10               | 1,3   |

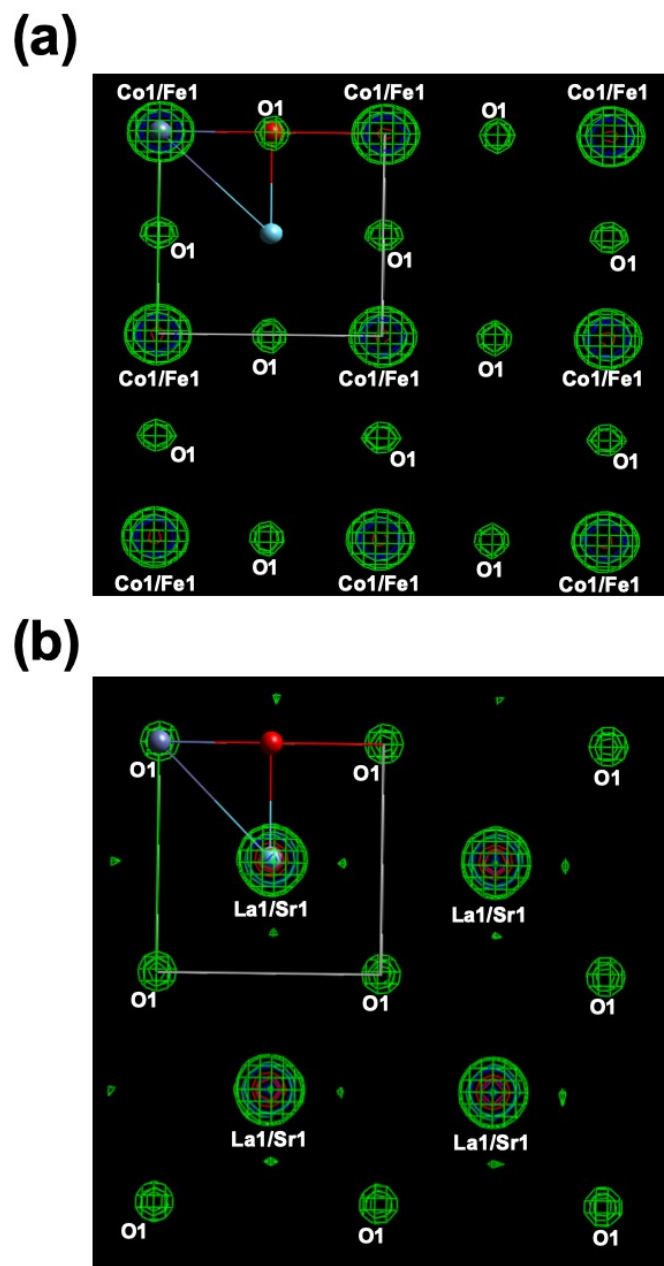

**Figure S1.** (001) view of the observed Fourier map for LSCF2882. The map width is 10.3 Å, and the center is at (a) (Co1/Fe1) and (b) (O1), respectively. All the densities are at the Co1/Fe1, and La1/Sr1 planes, respectively.



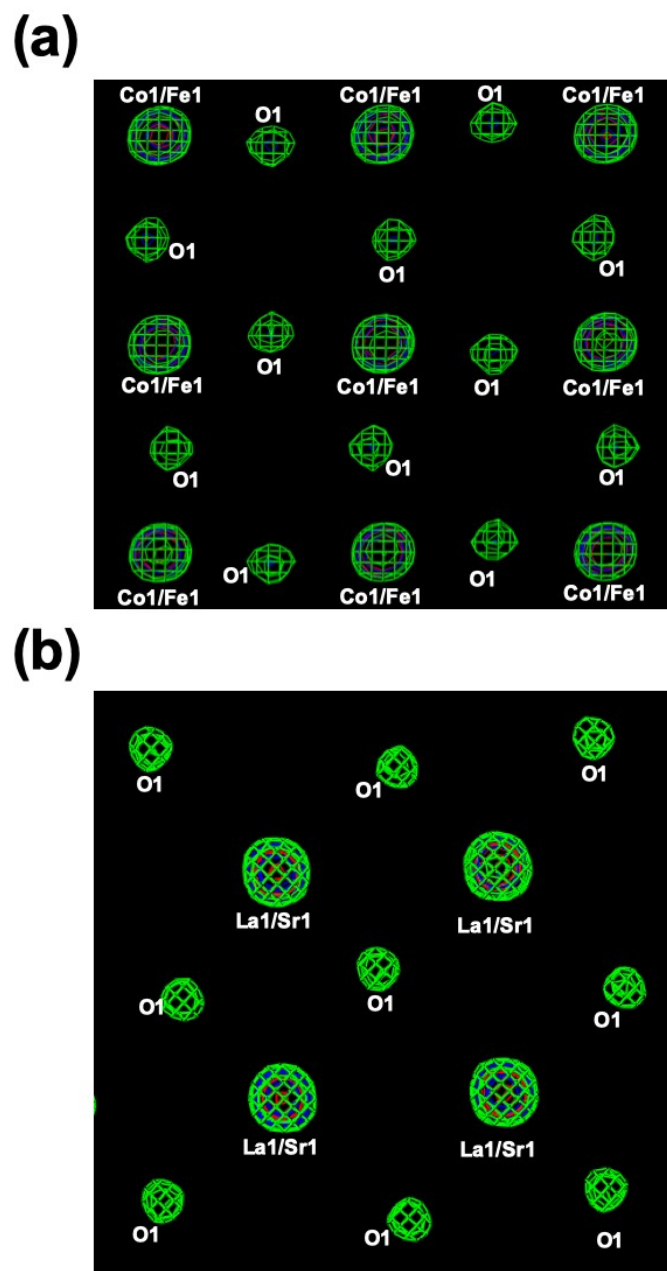

**Figure S2.** (201) view of the observed Fourier map for LSCF6428. The map width is 10.3 Å, and the center is at (a) (Co1/Fe1) and (b) (O1), respectively. All the densities are at the Co1/Fe1, and La1/Sr1 planes, respectively.

**(a)**

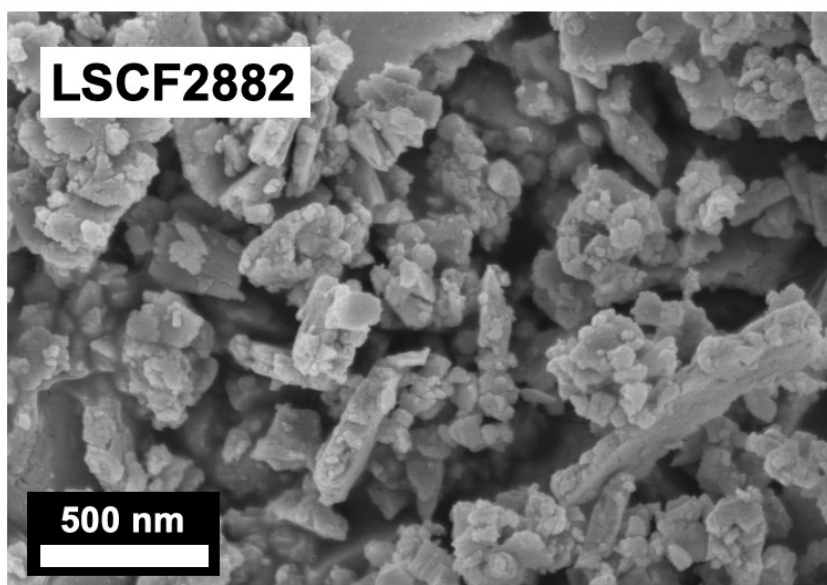

**(b)**

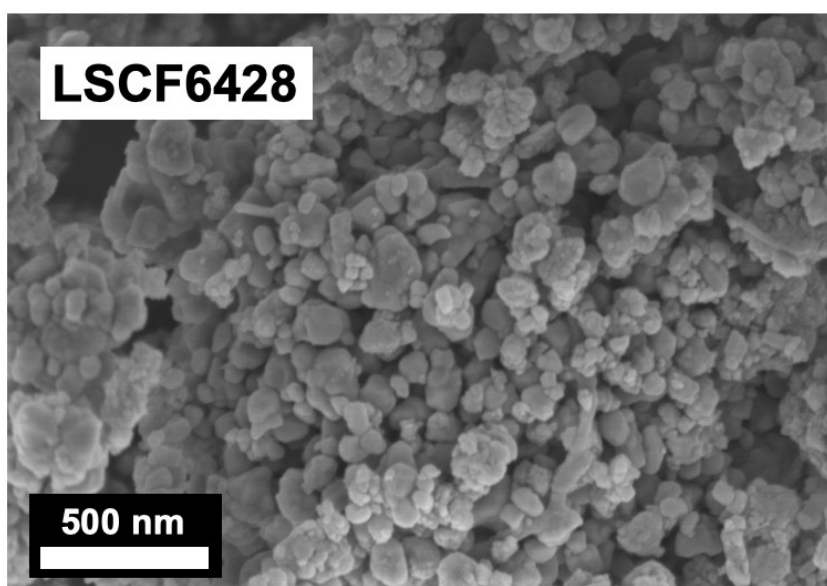

**Figure S3.** Microstructure analysis of (a) LSCF2882 and (b) LSCF6428 oxygen electrodes.

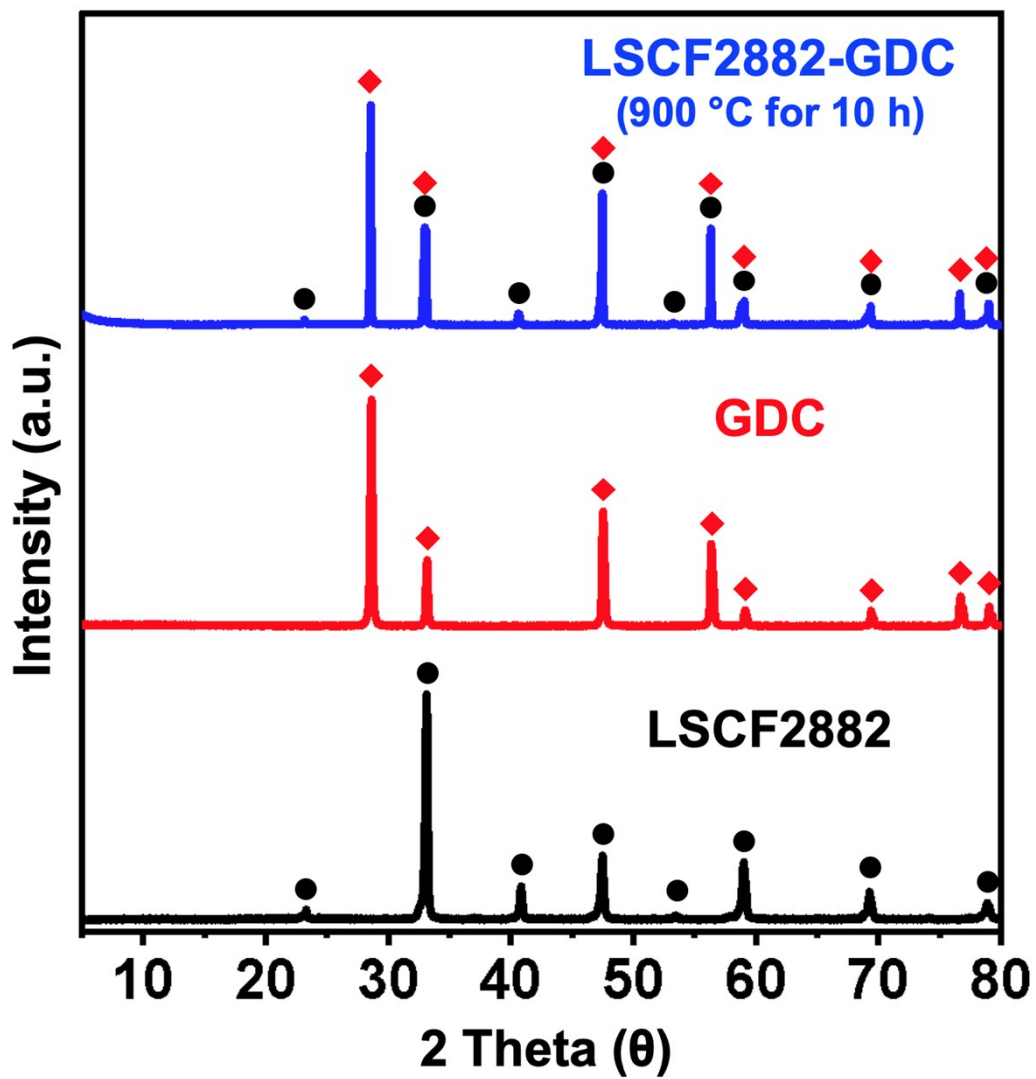

**Figure S4.** XRD results of the mixture of LSCF2882 and GDC powders annealed at 900 °C for 10 h in ambient air.

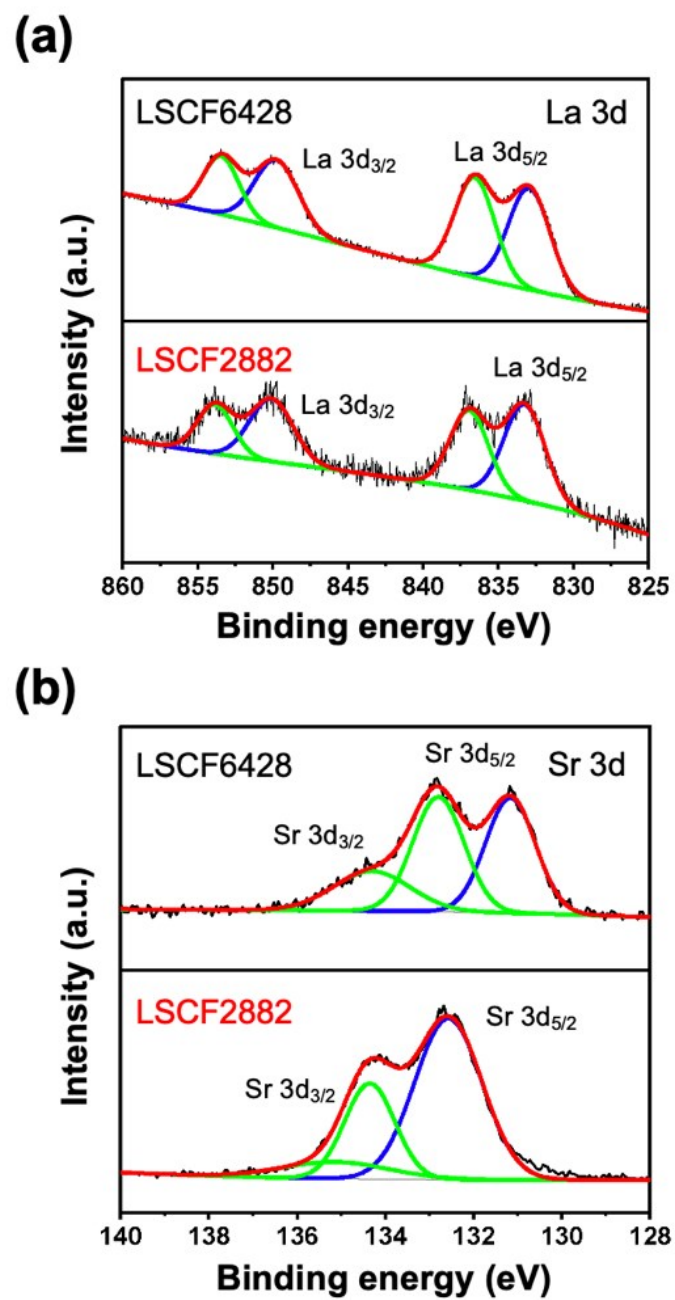

**Figure S5.** XPS spectra of (a) La 3d, and (b) Sr 3d for LSCF2882 and LSCF6428.

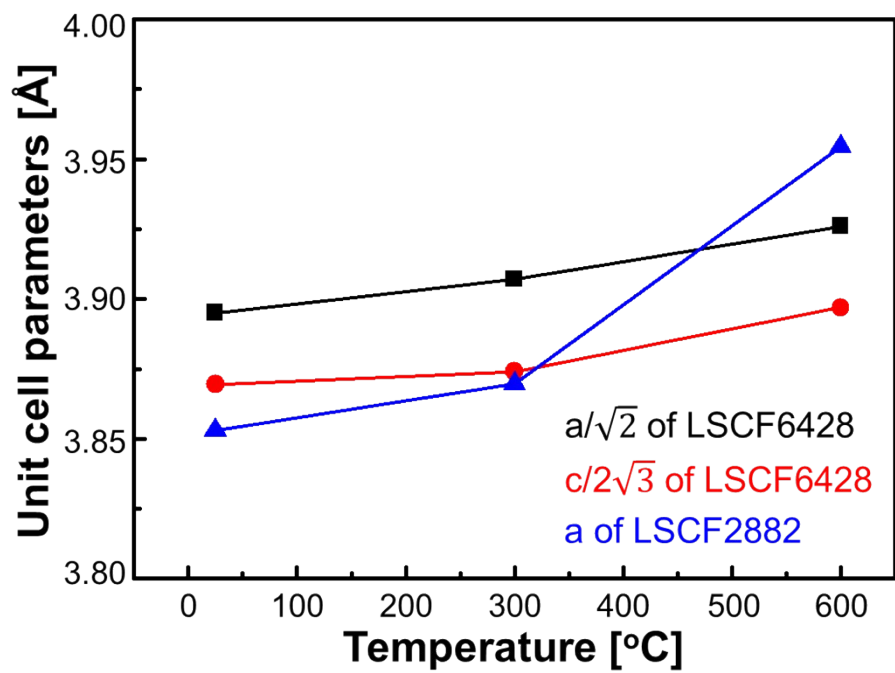

**Figure S6.** Evolution of unit cell parameters ( $a$ ,  $b$  and  $c$ ), and volume in LSCF2882 and LSCF6428 upon temperature increase.

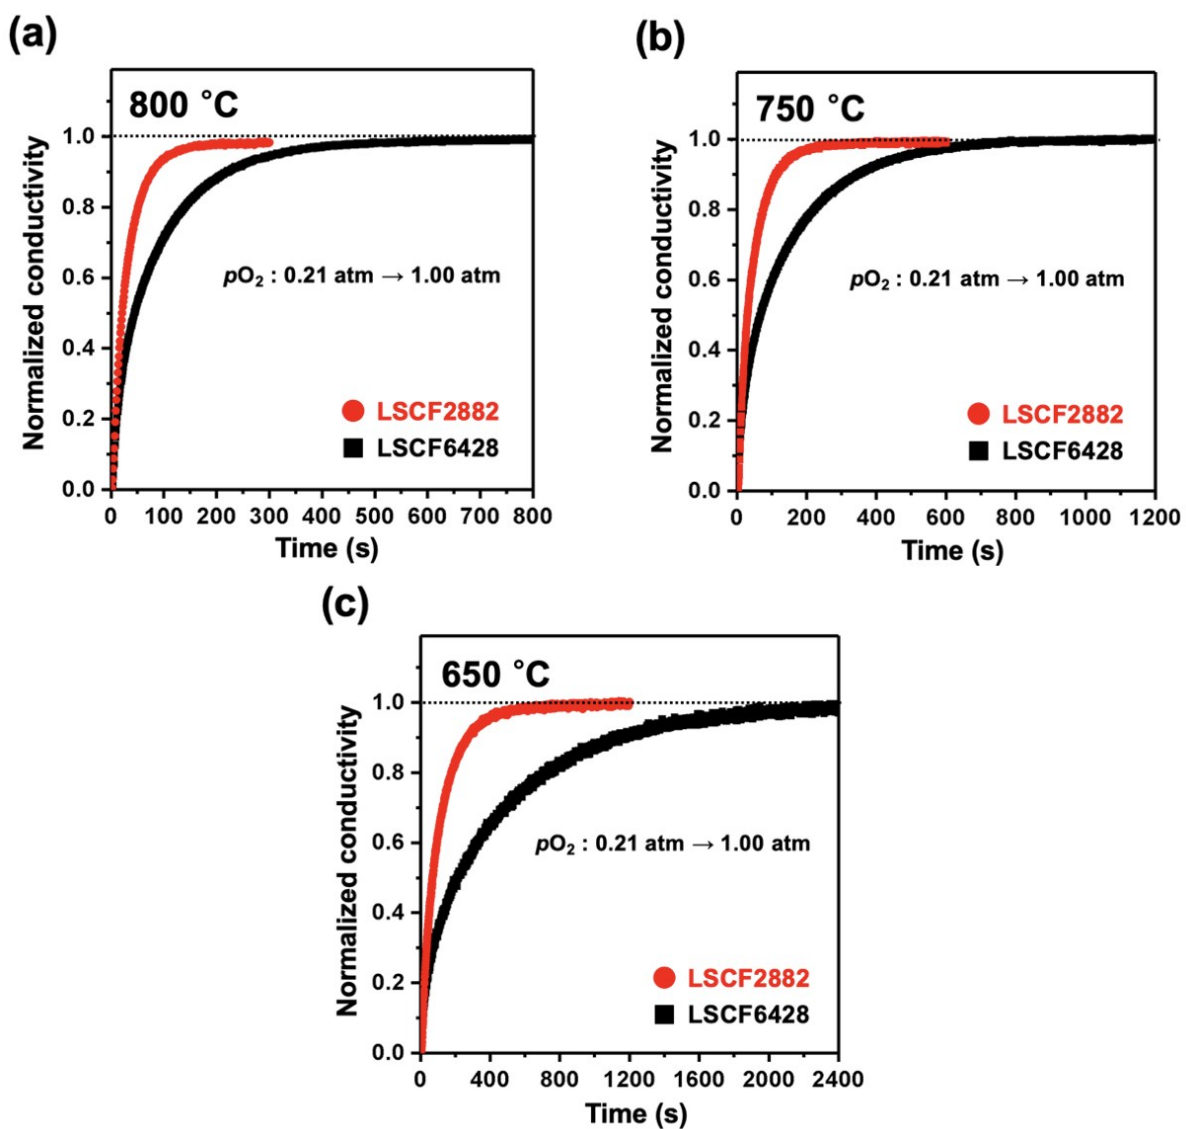

**Figure S7.** Comparison of resultant normalized conductivity relaxation curves for LSCF2882 and LSCF6428 at (a) 800, (b) 750, and (c) 650 °C.

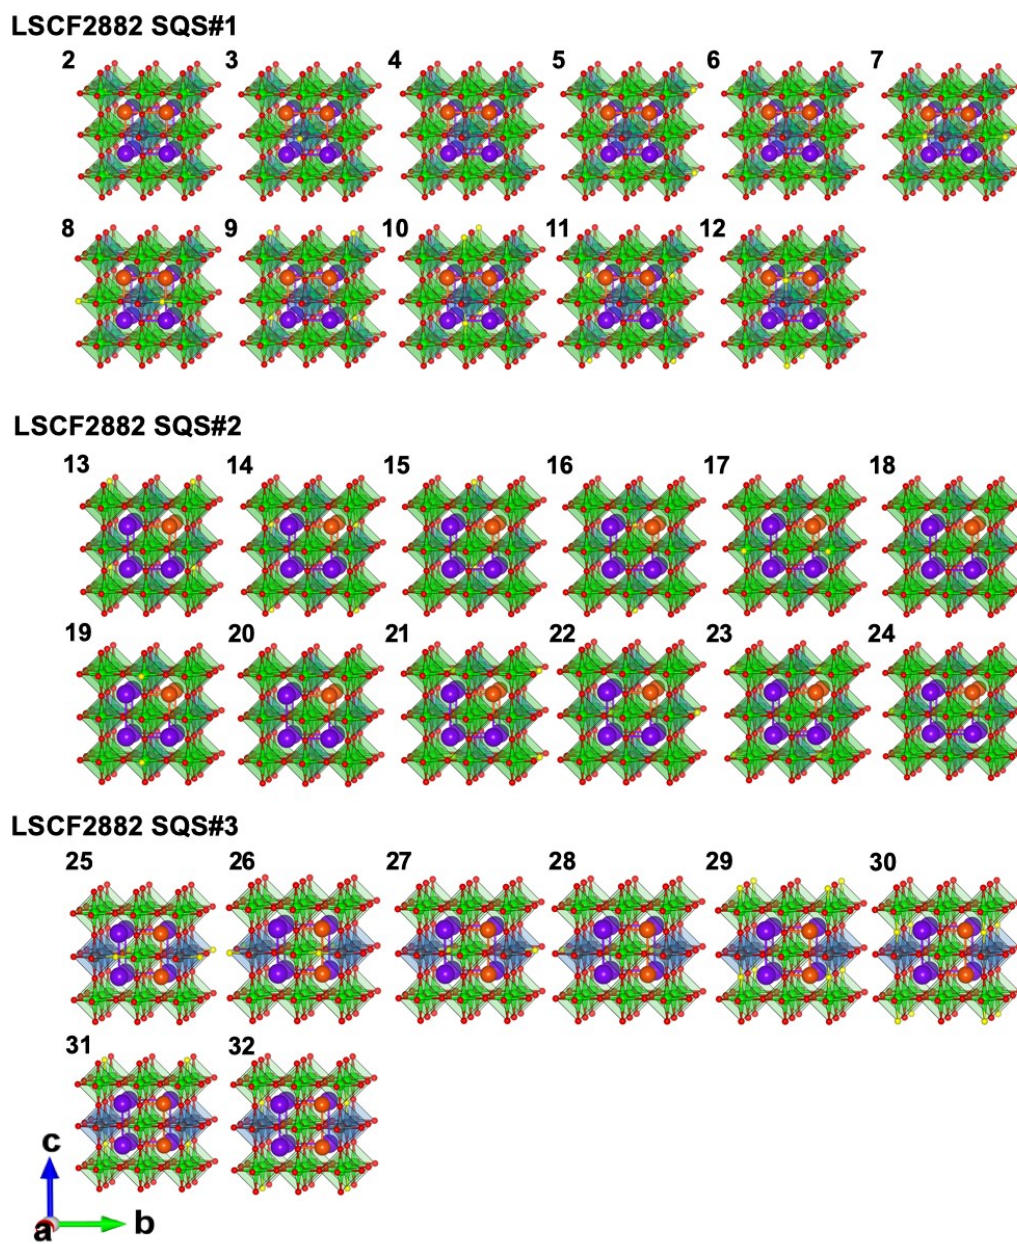

**Figure S8.** 31 single vacancy models from three SQS structures for LSCF2882 (first model is shown in Fig. 4a).

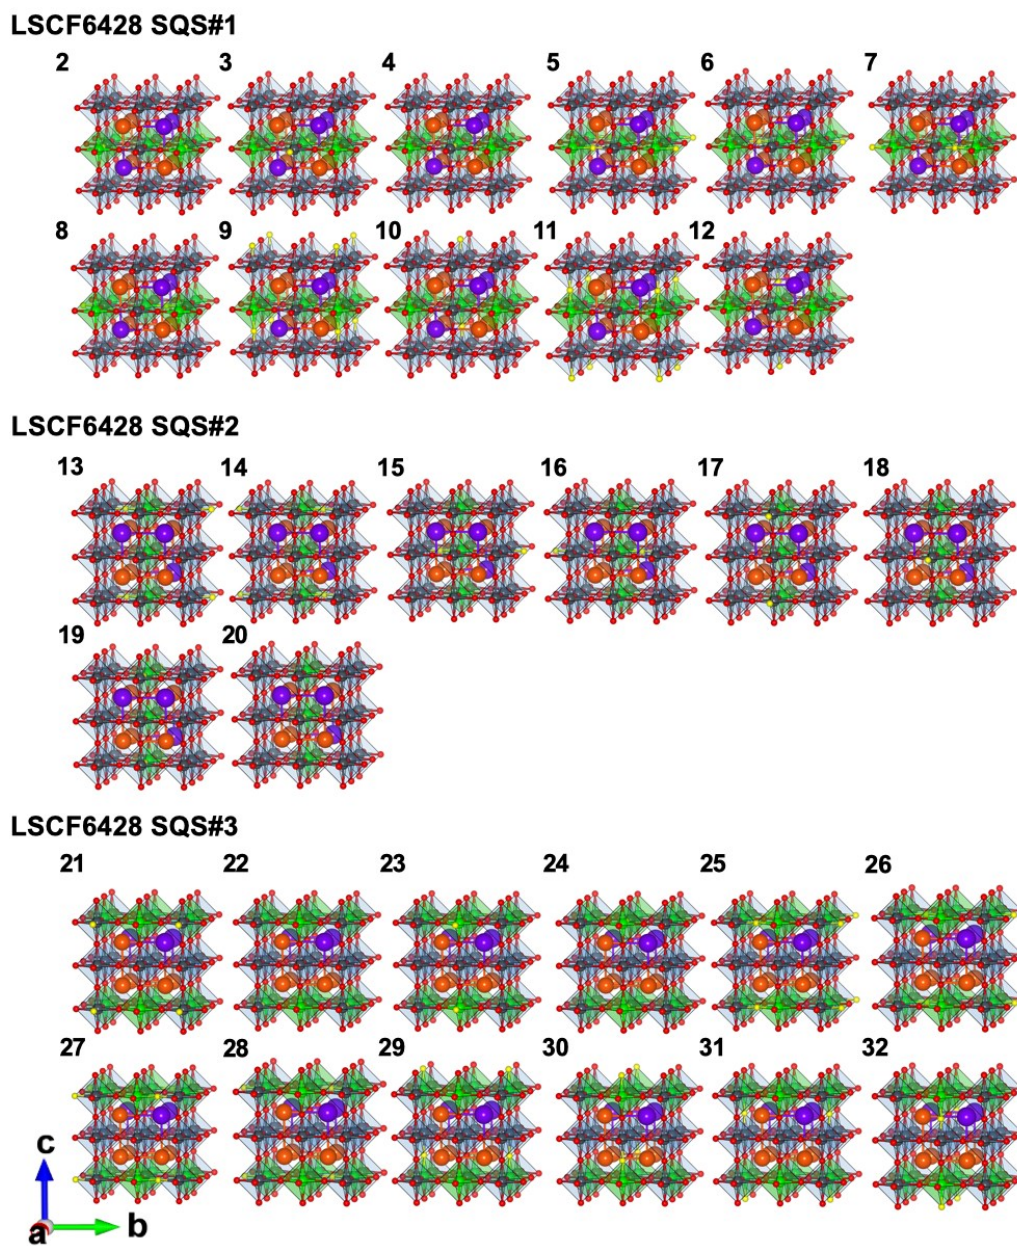

**Figure S9.** 31 single vacancy models from three SQS structures for LSCF6428 (first model is shown in Fig. 4b).



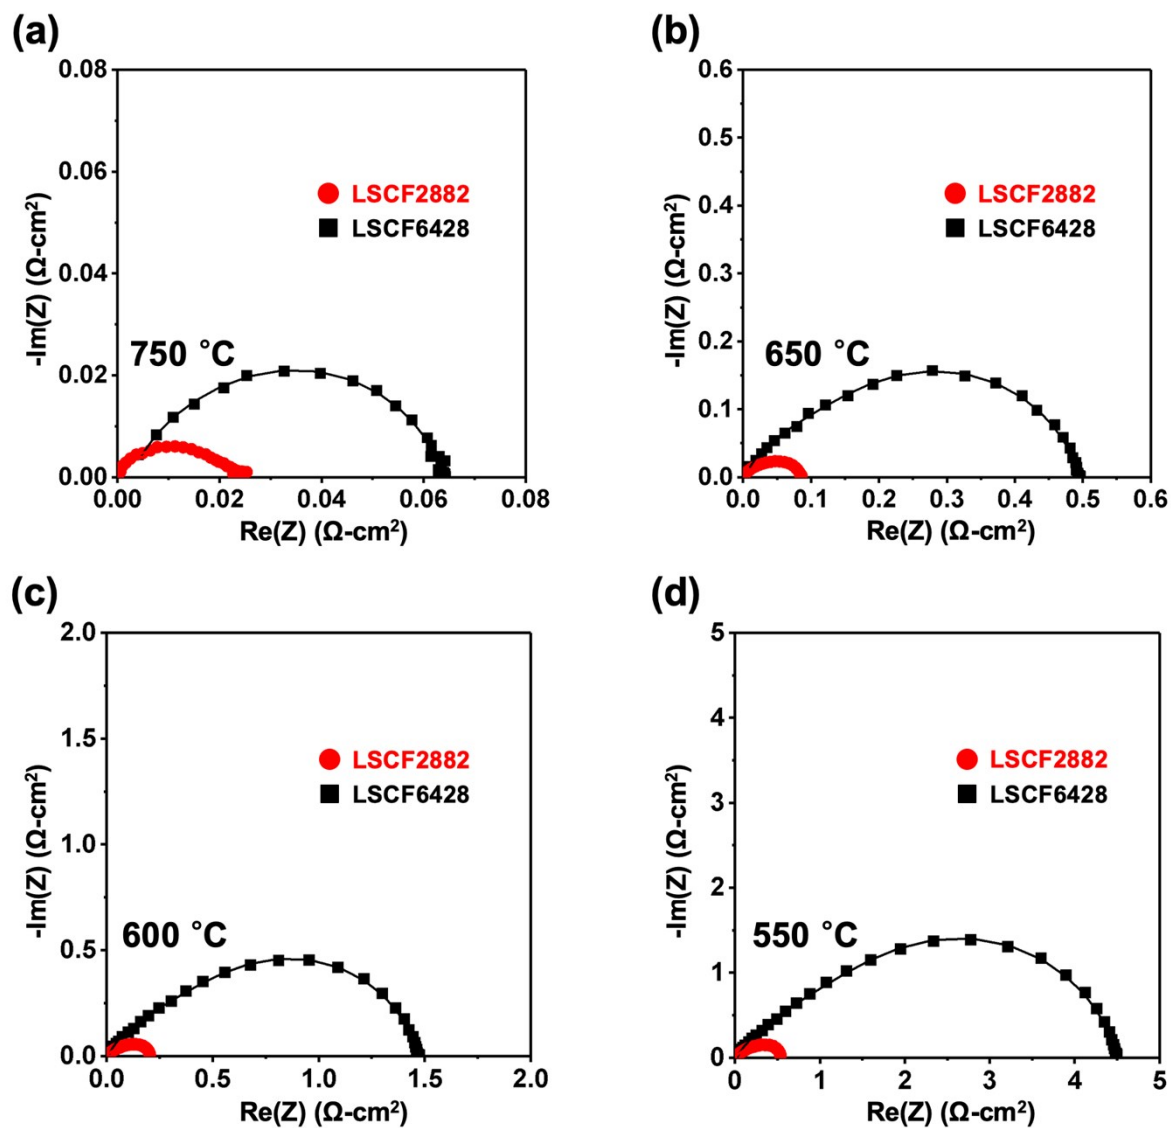

**Figure S10.** Nyquist plots of symmetrical cells at (a) 750, (b) 650, (c) 600, and (d) 550 °C for LSCF2882 and LSCF6428 oxygen electrodes.

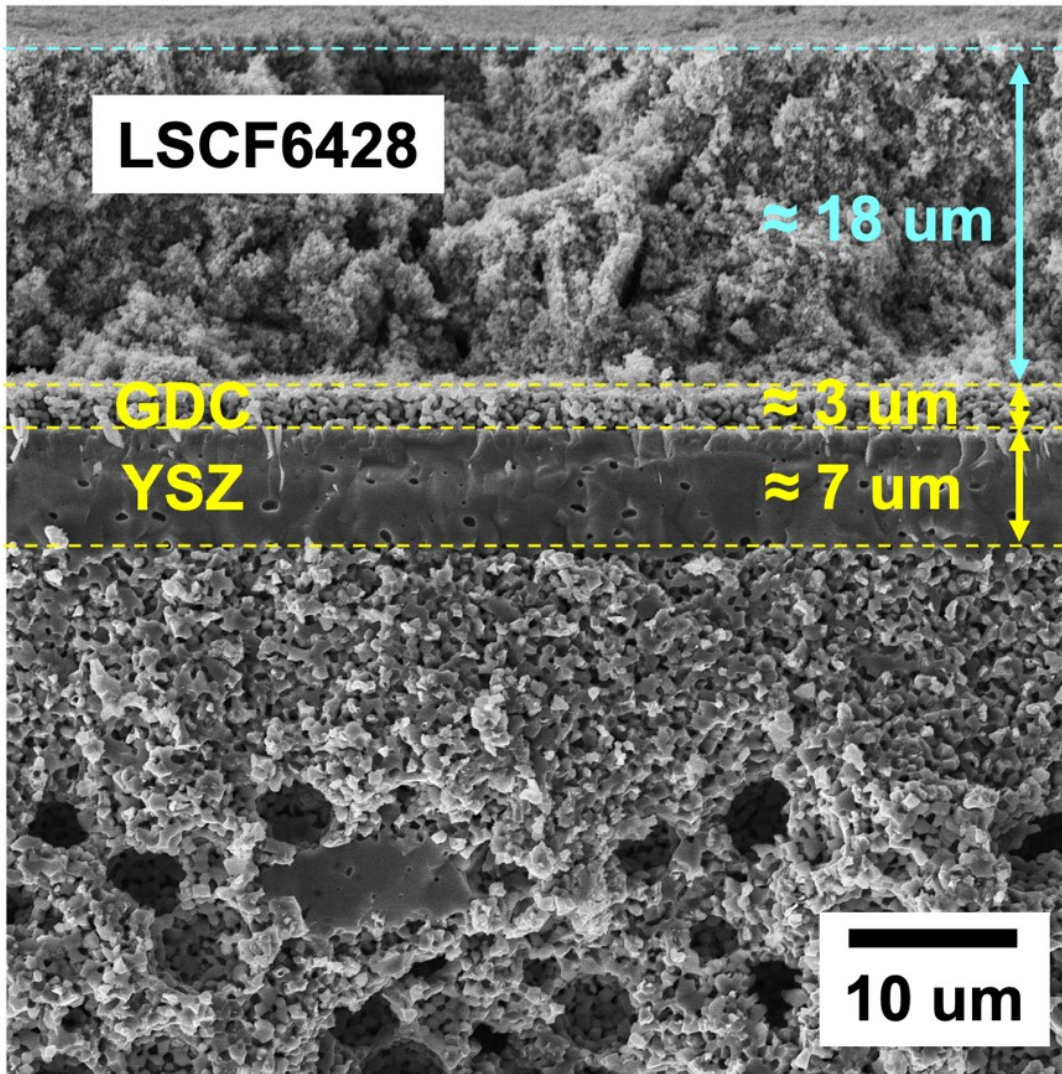

**Figure S11.** Cross-sectional SEM image of LSCF6428 cell.

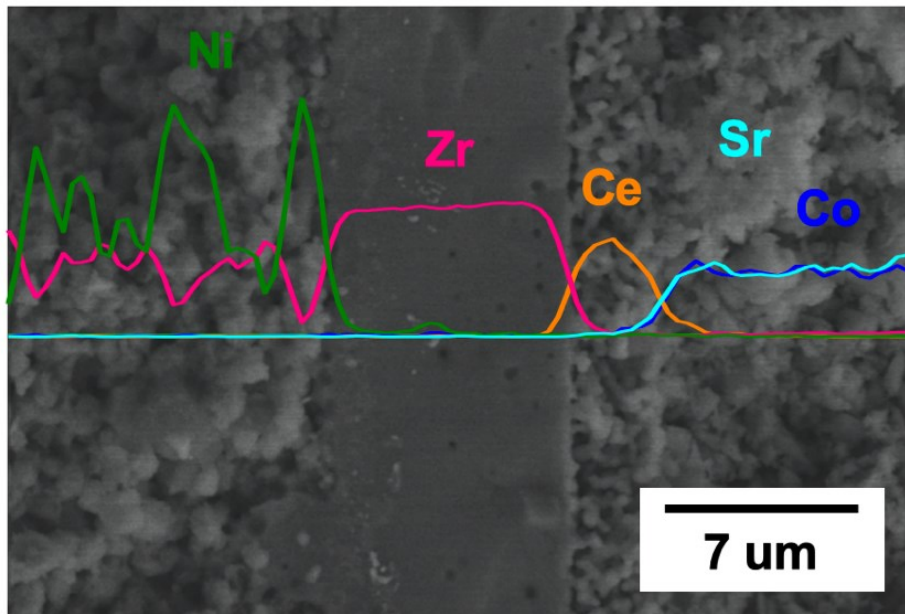

**Figure S12.** EDX element (Ni, Zr, Ce, Sr, Co) line spectra of a single cell with the LSCF2882 electrode.

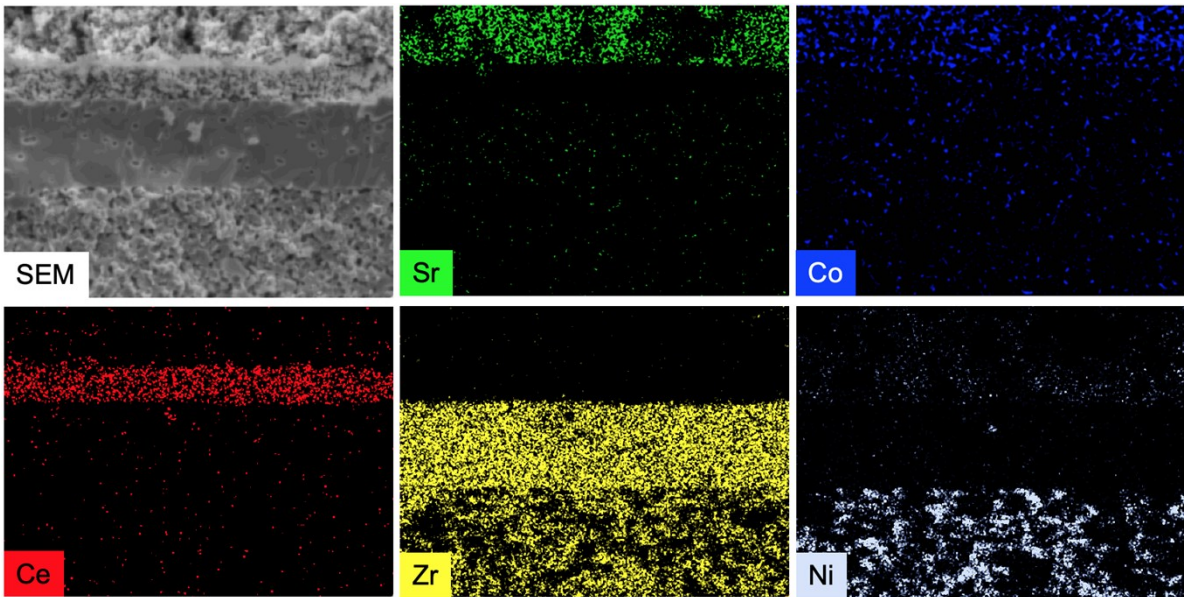

**Figure S13.** EDX element (Ni, Zr, Ce, Co, Sr) mapping of a single cell with the LSCF2882 electrode after stability test.

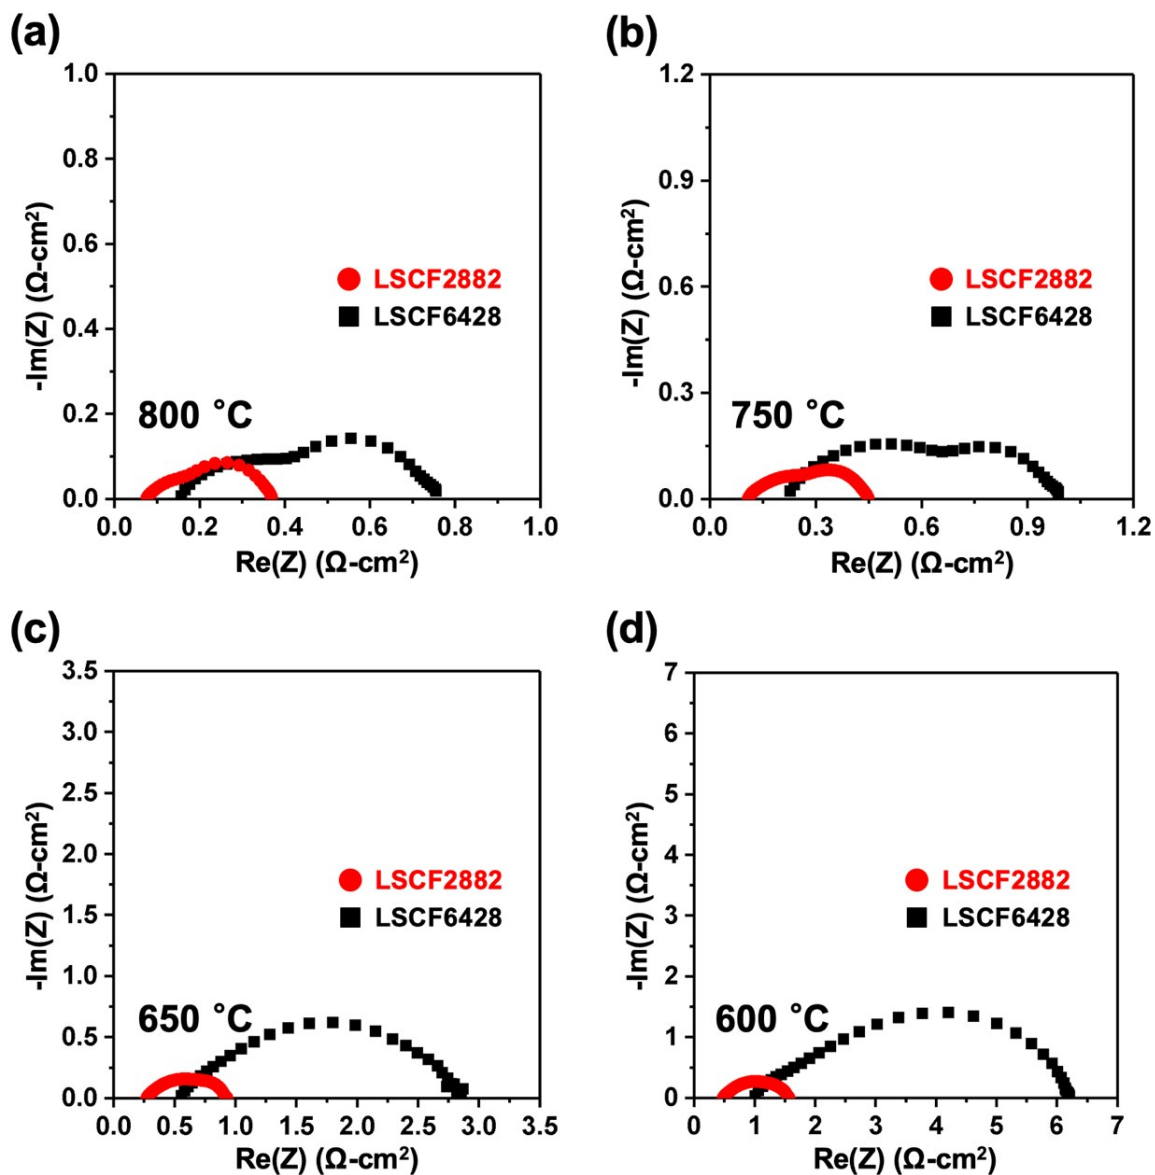

**Figure S14.** Electrochemical impedance spectra (Nyquist plots) at OCV for LSCF2882 and LSCF6428 cells at different temperatures ranging from 600 to 800 °C.

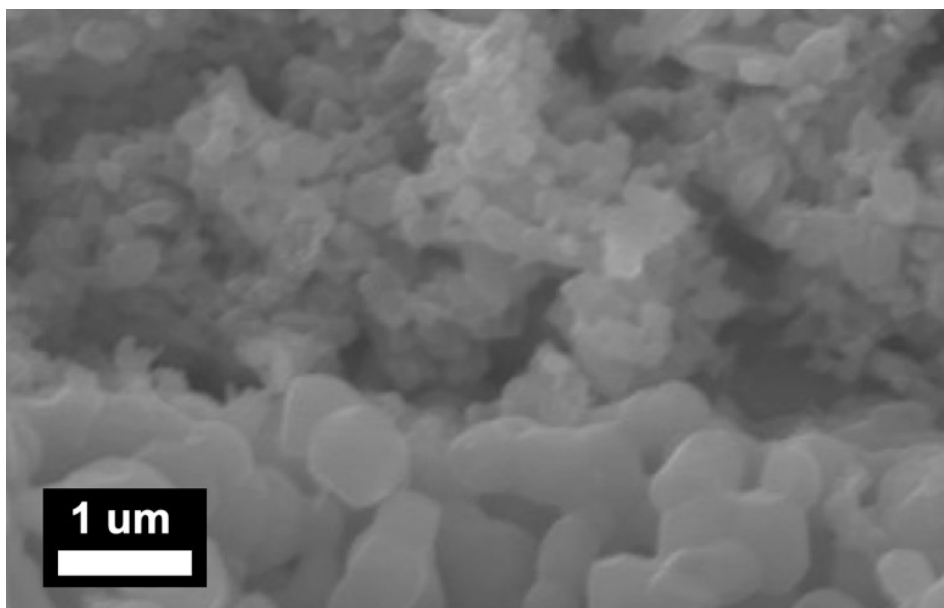

**Figure S15.** Cross-sectional surface SEM images of the interfaces between the LSCF2882 oxygen electrode and GDC buffer layer after reversible operation conditions.

## References

1. Y. Gu, Y. Zhang, Y. Zheng, H. Chen, L. Ge and L. Guo, *Appl. Catal. B Environ.*, 2019, 257, 117868.
2. Z. Gao, X. Liu, B. Mergman, Z. Zho, *Journal of Power Sources* 196 (2011) 9195-9203
3. Q. Ni, H. Chen, L. Ge, S. Yu, L. Guo, *Journal of Power Sources* 349 (2017) 130-137
4. F. Lu, T. Xia, Q. Li, J. Wang, L. Huo, H. Zhao, *Appl. Catal. B Environ.*, 2019, 249, 19-31.
